# Supplementary material
Source: PubMed Central journal article supplement (PMC5028125)
Supplement: NIHMS808929-supplement-1.pdf [file NIHMS808929-supplement-1.pdf]

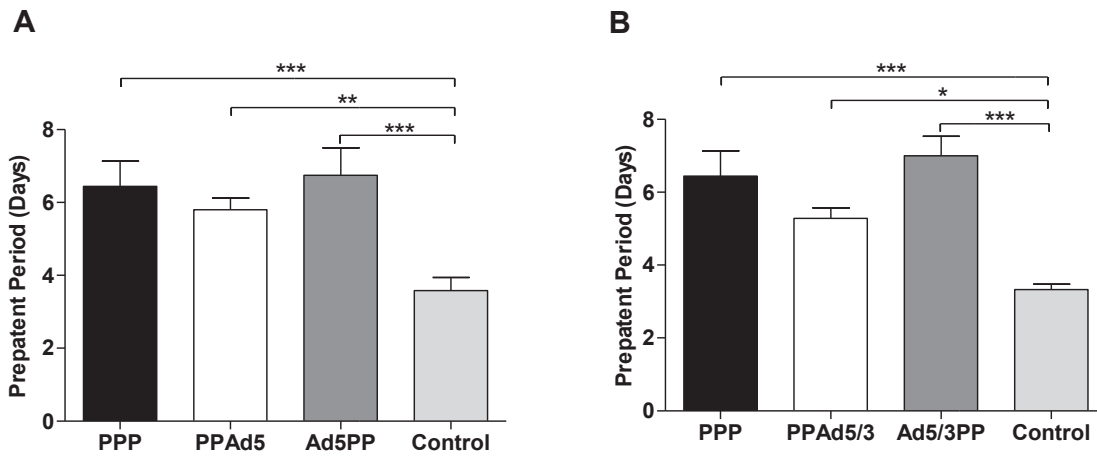

**Supplementary Figure 1. Prepatency periods changes induced by heterologous regimens based on Ad5 or Ad5/3 vectors.** 20 days after the final immunization mice were challenged with fresh *P. yoelii* sporozoites. The time lapse between the infection and the first positive slide or prepatency period is presented for the different heterologous regimens based on (A) Ad5 or (B) Ad5/3. Statistical analyses were performed using the Mann-Whitney test with Dunn's post-test. \* $p < 0.05$  \*\* $p < 0.01$  \*\*\* $p < 0.001$ .

**A**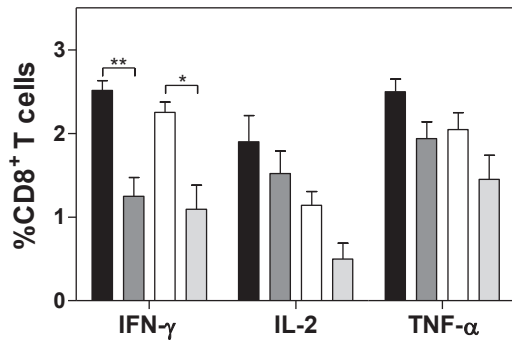**B**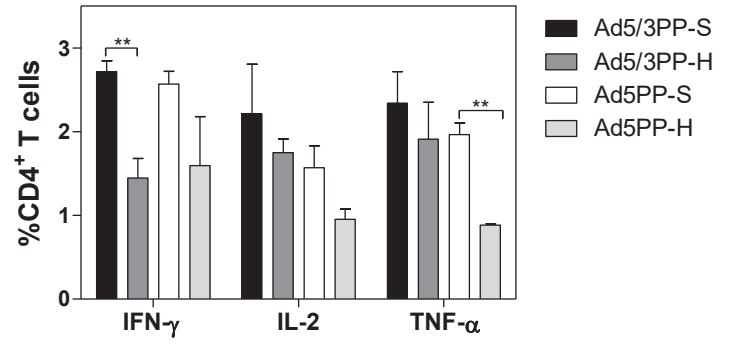

**Supplementary Figure 2. Effect of the adenoviral priming dose on the cytokine production induced by heterologous Ad Prime – Protein Boost Regimens** (A) Frequencies of splenic CD8<sup>+</sup> and (B) Frequencies of splenic CD4<sup>+</sup> IFN- $\gamma$ , IL-2 or TNF- $\alpha$  secreting T cells after stimulation with PyLPC/RMC. Splensens were obtained 5 days after the final immunization with the heterologous regimens. Results are presented after the subtraction of the responses of non-stimulated samples. Bars represent mean responses  $\pm$  standard deviations for five mice per group. \*p<0.05, \*\*p<0.01 by Mann-Whitney test comparing standard and high ad vector dose.
